# Supplementary material for: UV-A Supplement Improved Growth, Antioxidant Capacity, and Anthocyanin Accumulation in Purple Lettuce (Lactuca sativa L.)
Source: MDPI journal article supplement (doi:10.3390/horticulturae9060634), 2023-05-29
Supplement: s1 [file s1]

UV-A supplement improved growth, antioxidant capacity and anthocyanin accumulation in purple lettuce (*Lactuca sativa* L.)

### Supplementary material Captions to the table and figures

**Table S1** Light recipes and their photosynthetic photon flux density (PPFD,  $\mu\text{mol}\cdot\text{m}^{-2}\cdot\text{s}^{-1}$ ). W: white light. R: red light. B: blue light. UV-A: ultraviolet-A light. WRB is white light plus red and blue light,  $\text{SUV}_1$  is WRB plus  $10\ \mu\text{mol}\cdot\text{m}^{-2}\cdot\text{s}^{-1}$  UV-A (380 - 400 nm),  $\text{SUV}_2$  is WRB plus  $20\ \mu\text{mol}\cdot\text{m}^{-2}\cdot\text{s}^{-1}$  UV-A,  $\text{SUV}_3$  is WRB plus  $30\ \mu\text{mol}\cdot\text{m}^{-2}\cdot\text{s}^{-1}$  UV-A. Same as below.

**Table S2** Analysis of the LED light spectrum under different intensities of UV-A (%).

**Table S3** Design and synthesize primers.

**Table S4** Primer sequences of RT-qPCR.

**Table S1**

| Treatments     | W                                                        | R                                                        | B                                                       | UV-A                                                    |
|----------------|----------------------------------------------------------|----------------------------------------------------------|---------------------------------------------------------|---------------------------------------------------------|
| W (CK)         | $300\ \mu\text{mol}\cdot\text{m}^{-2}\cdot\text{s}^{-1}$ | $0\ \mu\text{mol}\cdot\text{m}^{-2}\cdot\text{s}^{-1}$   | $0\ \mu\text{mol}\cdot\text{m}^{-2}\cdot\text{s}^{-1}$  | $0\ \mu\text{mol}\cdot\text{m}^{-2}\cdot\text{s}^{-1}$  |
| WRB            | $150\ \mu\text{mol}\cdot\text{m}^{-2}\cdot\text{s}^{-1}$ | $120\ \mu\text{mol}\cdot\text{m}^{-2}\cdot\text{s}^{-1}$ | $30\ \mu\text{mol}\cdot\text{m}^{-2}\cdot\text{s}^{-1}$ | $0\ \mu\text{mol}\cdot\text{m}^{-2}\cdot\text{s}^{-1}$  |
| $\text{SUV}_1$ | $140\ \mu\text{mol}\cdot\text{m}^{-2}\cdot\text{s}^{-1}$ | $120\ \mu\text{mol}\cdot\text{m}^{-2}\cdot\text{s}^{-1}$ | $30\ \mu\text{mol}\cdot\text{m}^{-2}\cdot\text{s}^{-1}$ | $10\ \mu\text{mol}\cdot\text{m}^{-2}\cdot\text{s}^{-1}$ |
| $\text{SUV}_2$ | $130\ \mu\text{mol}\cdot\text{m}^{-2}\cdot\text{s}^{-1}$ | $120\ \mu\text{mol}\cdot\text{m}^{-2}\cdot\text{s}^{-1}$ | $30\ \mu\text{mol}\cdot\text{m}^{-2}\cdot\text{s}^{-1}$ | $20\ \mu\text{mol}\cdot\text{m}^{-2}\cdot\text{s}^{-1}$ |
| $\text{SUV}_3$ | $120\ \mu\text{mol}\cdot\text{m}^{-2}\cdot\text{s}^{-1}$ | $120\ \mu\text{mol}\cdot\text{m}^{-2}\cdot\text{s}^{-1}$ | $30\ \mu\text{mol}\cdot\text{m}^{-2}\cdot\text{s}^{-1}$ | $30\ \mu\text{mol}\cdot\text{m}^{-2}\cdot\text{s}^{-1}$ |

**Table S2**

| Treatments     | Ultraviolet<br>(380-400nm) | Blue<br>(400-510nm) | Green<br>(510-610nm) | Red<br>(610-720nm) | Fae-red<br>(720-780nm) |
|----------------|----------------------------|---------------------|----------------------|--------------------|------------------------|
| W (CK)         | 0.2                        | 34.9                | 46.0                 | 17.3               | 1.3                    |
| WRB            | 0.2                        | 27.0                | 25.7                 | 46.1               | 1.0                    |
| $\text{SUV}_1$ | 10.8                       | 30.6                | 16.2                 | 41.2               | 1.1                    |
| $\text{SUV}_2$ | 16.8                       | 36.1                | 14.1                 | 32.2               | 0.8                    |
| $\text{SUV}_3$ | 19.5                       | 37.7                | 12.2                 | 29.9               | 0.7                    |

**Table S3**

| Genes | Accession No. | Primers | Sequences (5' to 3')  |
|-------|---------------|---------|-----------------------|
| bHLH  | MF579554      | bHLH-F  | GAGGATCTTACGGAGGCTGAA |
|       |               | bHLH-R  | TGTGGCGTGATGCTGAGTG   |
| DFR   | MF579548      | DFR-F   | GAAAGAGGATTCTCCGACCAC |
|       |               | DFR-R   | GGAGGGAATGAGGGAGTGAT  |

**Table S4**

| Accession No. | Genes | Primers | Sequences (5' to 3')    |
|---------------|-------|---------|-------------------------|
| AB525912      | ANS   | ANS-F   | CCTCCACGCCCAATGATTA     |
|               |       | ANS-R   | CCTCTAGTCCTAACCCAAGAGA  |
| MF579545      | CHI   | CHI-F   | AGACATTGTTACTGGTCCCTTC  |
|               |       | CHI-R   | CACCAACGCACATTTTCAGATAC |
| AB525909      | CHS   | CHS-F   | CTTAAGGATGTTCCAGGGTTGA  |
|               |       | CHS-R   | GATGGAGTTCAGTCGGTTATC   |

|          |      |        |                        |
|----------|------|--------|------------------------|
| MF579548 | DFR  | DFR-F  | TGACGTTATGGAAGGCAGATT  |
|          |      | DFR-R  | GACTGAAAGTCCATAGGCGTAG |
| AB525911 | UFGT | UFGT-F | TGGTCCCTTCCATCTCATCT   |
|          |      | UFGT-R | GAGATGTAGGCCACTGATCTTG |
| AF411134 | PAL  | PAL-F  | CAGAAGCTCCGACAGGTTATC  |
|          |      | PAL-R  | ACGGCTTTCAGTTCCTCTTC   |
| AB525910 | F3H  | F3H-F  | CCTTGAGAAAGAAGCCCTAACT |
|          |      | F3H-R  | CCAATGTGAGATCGGGTTGA   |

---
